# Supplementary material for: Staphylococcus aureus lipoproteins promote abscess formation in mice, shielding bacteria from immune killing
Source: Commun Biol. 2021 Mar 30;4:432. doi: 10.1038/s42003-021-01947-z (PMC8010101; doi:10.1038/s42003-021-01947-z)
Supplement: Supplementary file 2 — Supplementary Information [file 42003_2021_1947_MOESM2_ESM.pdf]

## Supplementary information

### ***Staphylococcus aureus* lipoproteins promote abscess formation in mice, shielding bacteria from immune killing**

Majd Mohammad<sup>1\*</sup>, Manli Na<sup>1</sup>, Zhicheng Hu<sup>1,2</sup>, Minh-Thu Nguyen<sup>3,a</sup>, Pradeep Kumar Kopparapu<sup>1</sup>, Anders Jarneborn<sup>1,4</sup>, Anna Karlsson<sup>1</sup>, Abukar Ali<sup>1</sup>, Rille Pullerits<sup>1,5</sup>, Friedrich Götz<sup>3</sup>, Tao Jin<sup>1,4</sup>

<sup>1</sup> Department of Rheumatology and Inflammation Research, Institute of Medicine, Sahlgrenska Academy, University of Gothenburg, Gothenburg, Sweden

<sup>2</sup> Department of Microbiology and Immunology, The Affiliated Hospital of Guizhou Medical University, Guiyang, China

<sup>3</sup> Department of Microbial Genetics, Interfaculty Institute of Microbiology and Infection Medicine Tübingen (IMIT), University of Tübingen, Tübingen, Germany

<sup>4</sup> Department of Rheumatology, Sahlgrenska University Hospital, Gothenburg, Sweden

<sup>5</sup> Department of Clinical Immunology and Transfusion Medicine, Sahlgrenska University Hospital, Gothenburg, Sweden

<sup>a</sup> Current affiliation: Section of Medical and Geographical Infectiology, Institute of Medical Microbiology, University Hospital of Münster, Münster, Germany

\* Corresponding author:

M.M.: [majd.mohammad@rheuma.gu.se](mailto:majd.mohammad@rheuma.gu.se); Department of Rheumatology and Inflammation Research, University of Gothenburg, Guldhedsgatan 10A, S-413 46 Gothenburg, Sweden. Tel: +46-31-3426475.

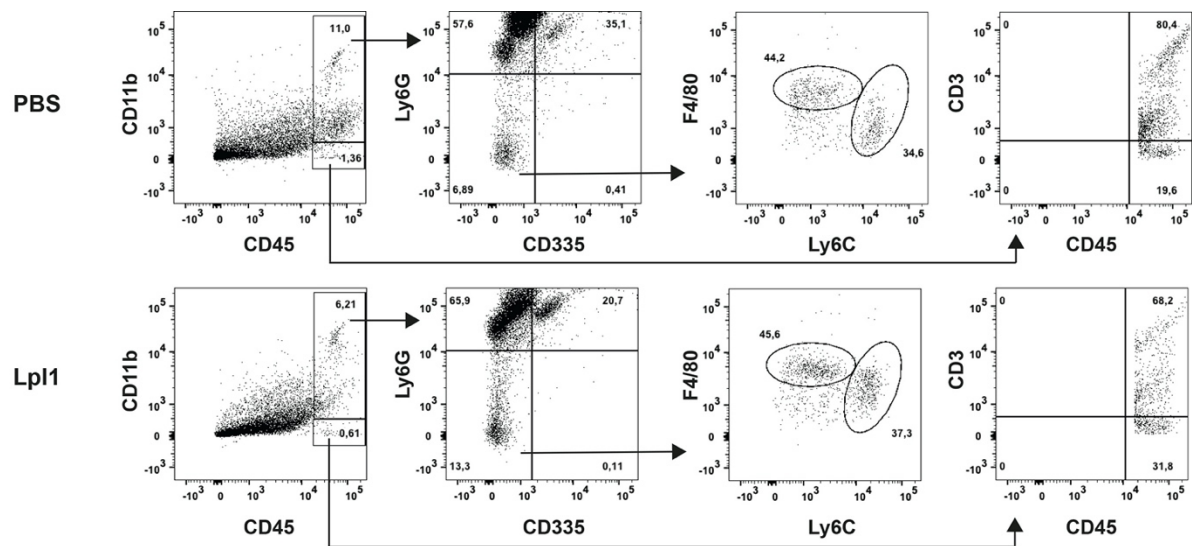

**Supplementary Fig. 1: Migration of immune cells to the local skin following subcutaneous injection with *S. aureus* Lpp in TLR2 deficient mice as confirmed by flow cytometry analysis.**

Representative FACS dot plots of cells isolated from auricular skin tissue following subcutaneous injection of phosphate-buffered saline (PBS) (upper panel) or purified *Staphylococcus aureus* lipoprotein, denoted as Lpl1 (1  $\mu$ g) (lower panel) in the mouse ear in TLR2 deficient (TLR2<sup>-/-</sup>) mice.

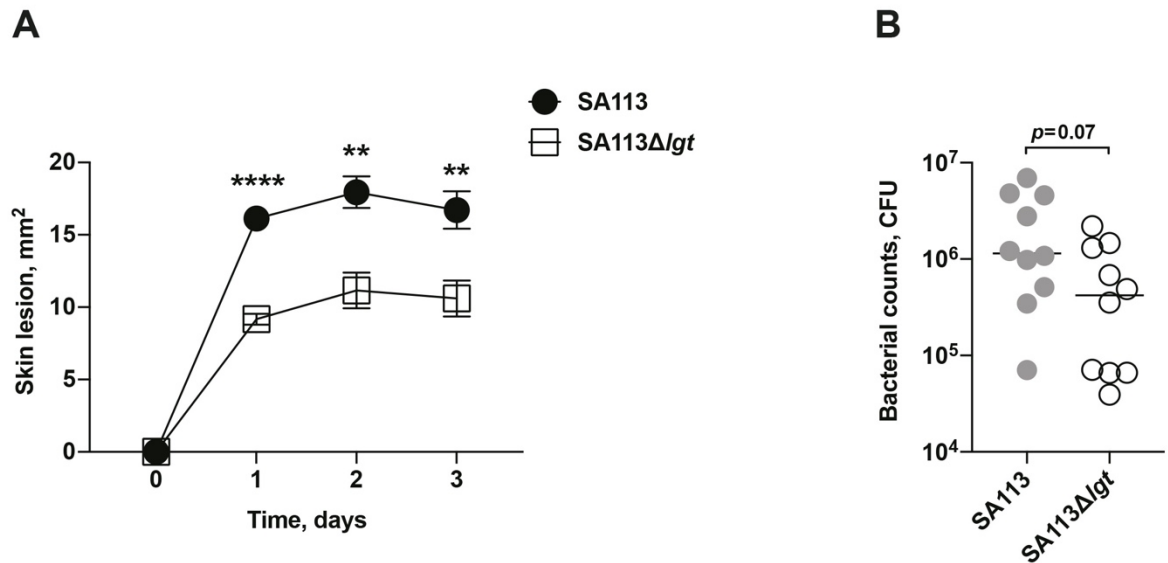

**Supplementary Fig. 2: The reduced bacterial dose setting induces severe skin lesions in SA113 parental strain with a tendency of higher bacterial burden in local skin compared to its Δ*lgt* mutant strain.**

(A) The skin lesion size (mm<sup>2</sup>) in NMRI mice followed up to 3 days after subcutaneous (s.c.) skin injection with 50 μl of *Staphylococcus aureus* SA113 parental strain or SA113Δ*lgt* mutant strain ( $7.5 \times 10^6$  CFU/site; n = 10/group). (B) Bacterial counts in the supernatant of skin biopsy homogenates on day 3 after s.c. skin infection with SA113 parental strain or SA113Δ*lgt* mutant strain ( $7.5 \times 10^6$  CFU/site; n = 10/group) in NMRI mice. The data were pooled from 2 independent experiments. Statistical evaluations were performed using the Mann–Whitney U test, with data expressed as the mean ± standard error of the mean (A), or presented as scatterplot with line indicating median value (B). \*\* $P < 0.01$ ; \*\*\* $P < 0.001$ .

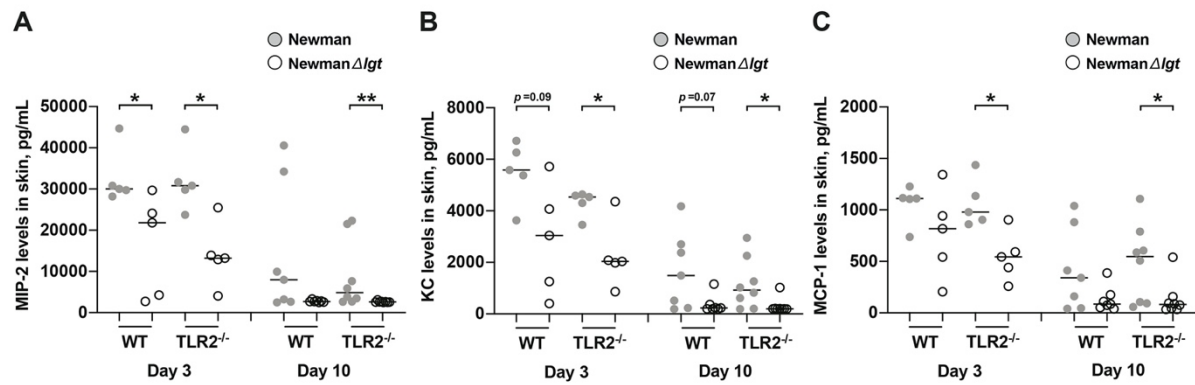

**Supplementary Fig. 3: The levels of chemokines in skin tissues from mice infected with *Staphylococcus aureus* Newman or NewmanΔlgt mutant strain.**

The levels of (A) macrophage inflammatory protein-2 (MIP-2), (B) keratinocyte chemoattractant (KC) and (C) monocyte chemoattractant protein 1 (MCP-1) in the supernatant of skin biopsy homogenates of C57BL/6 wild-type (WT) mice and TLR2 deficient (TLR2<sup>-/-</sup>) mice on day 3 (n = 5/group) and day 10 (n = 7-8/group) after subcutaneous (s.c.) skin injection with 20 μl of *Staphylococcus aureus* Newman parental strain or NewmanΔlgt mutant strain (1.5 – 2.0 x 10<sup>6</sup> colony-forming units/site). The data were pooled from 2 independent experiments. Statistical evaluations were performed using the Mann–Whitney U test, with data presented as scatterplot with line indicating median value. \*P < 0.05; \*\*P < 0.01.

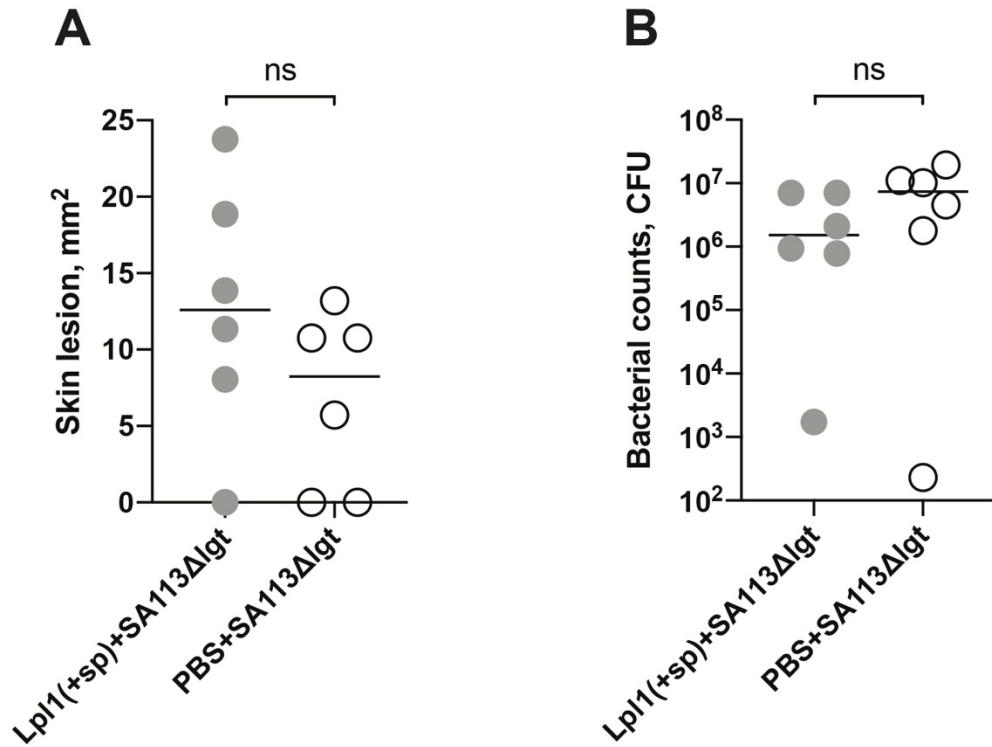

**Supplementary Fig. 4: Similar lesion severity and bacterial burden at the early disease course following coinjection of live *S. aureus* with either Lpp or control substance.**

(**A**) The skin lesion size (mm<sup>2</sup>) and (**B**) bacterial counts in the supernatant of skin biopsy homogenates of NMRI mice (n = 6/group) 1 day after subcutaneous skin coinjection with 20  $\mu$ l of *Staphylococcus aureus* (*S. aureus*) SA113Δlgt mutant strain ( $2.4 \times 10^6$  colony-forming units [CFU/site]) with either phosphate-buffered saline (PBS) or purified *S. aureus* lipoprotein, denoted as Lpl1(+sp) (5  $\mu$ g/site). Statistical evaluations were performed using the Mann–Whitney U test, with data presented as scatterplot with line indicating median value. ns = not significant.

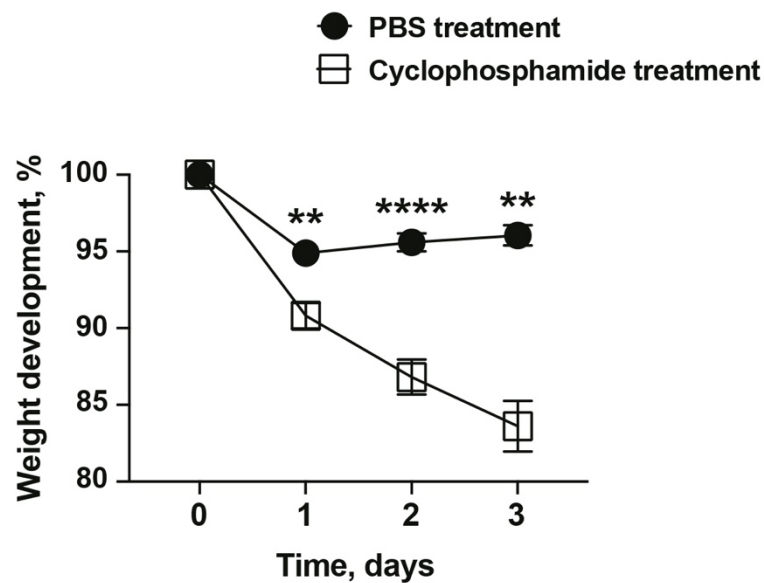

**Supplementary Fig. 5: Leukocyte depletion induces severe weight loss in mice.**

The weight changes up to 3 days after subcutaneous (s.c.) skin injection with 20  $\mu$ l of *Staphylococcus aureus* Newman parental strain or Newman $\Delta$ lgt mutant strain ( $2 \times 10^6$  colony-forming units (CFU)/site) in NMRI mice depleted of leukocytes using cyclophosphamide or treated with phosphate-buffered saline (PBS) as control ( $n = 8-10$ /group). The data were pooled from 2 independent experiments. Statistical evaluations were performed using the Mann–Whitney U test, with data expressed as the mean  $\pm$  standard error of the mean. \*\* $P < 0.01$ ; \*\*\*\* $P < 0.0001$ .

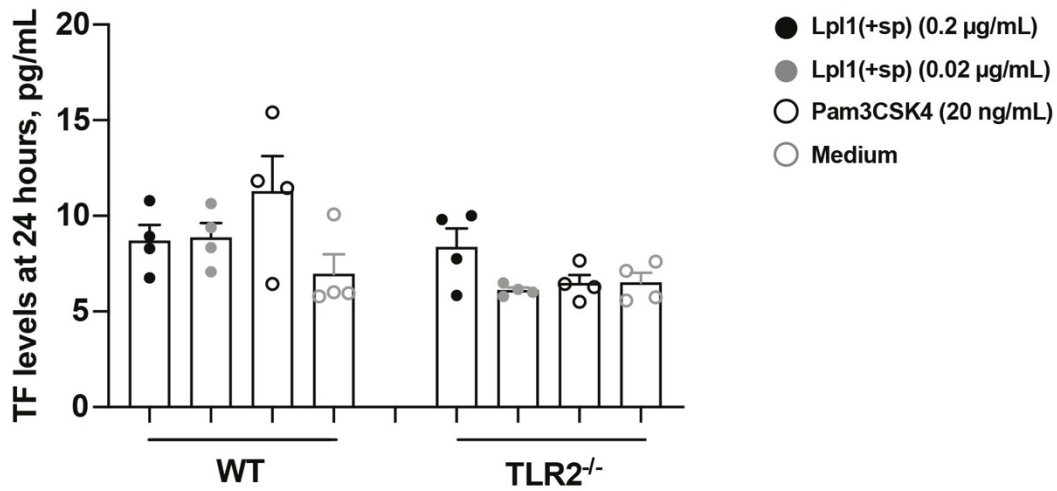

**Supplementary Fig. 6: *Staphylococcus aureus* lipoproteins do not induce tissue factor expression in mouse peritoneal macrophages.**

The levels of tissue factor (TF) in the supernatants collected from C57BL/6 wildtype (WT) and TLR2 deficient (TLR2<sup>-/-</sup>) (n = 4/group) mouse peritoneal macrophage cell cultures (5x10<sup>5</sup> cells/mL) after stimulation for 24 hours with purified *Staphylococcus aureus* lipoprotein, denoted as Lp11(+sp) (0.02 or 0.2 µg/mL), Pam3CSK4 (20 ng/mL), or culture medium. Statistical evaluations were performed using the Mann–Whitney U test, with data expressed as the mean ± standard error of the mean.

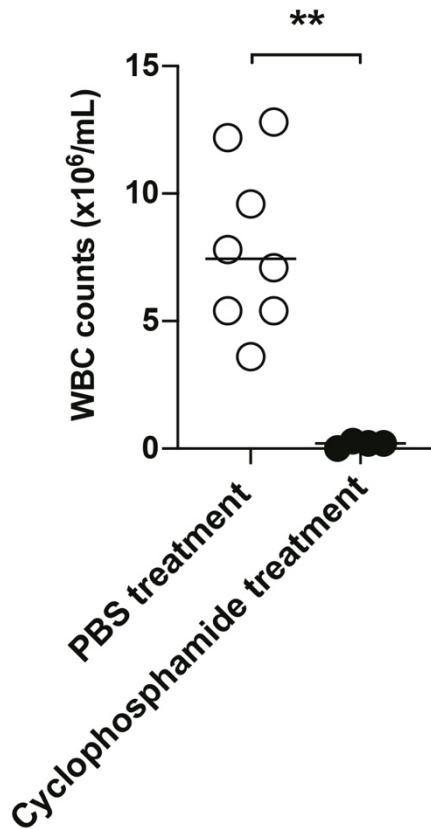

**Supplementary Fig. 7: Efficacy of leukocyte depletion in mice by cyclophosphamide treatment.**

NMRI mice were treated with either PBS as a control substance, or with cyclophosphamide in order to deplete leukocytes, four days and one day prior to the skin infection with *Staphylococcus aureus*. The mice were sacrificed on day 3 postinfection and the level of peripheral mouse blood leukocytes were thereafter assessed in a cell counter (n = 4-8/group). The data were pooled from 2 independent experiments. Statistical evaluations were performed using the Mann–Whitney U test, with data presented as scatterplot with line indicating median value (B). \*\* $P < 0.01$ .

**Supplementary Table 1:** Incidence of bacterial counts from various organs on day 3 postinfection in fibrinogen-depleted mice (using Ancrod) or in PBS-treated controls (n = 4/group) after subcutaneous infection with *Staphylococcus aureus*.

|        | Blood | Kidneys | Liver | Spleen | Lungs |
|--------|-------|---------|-------|--------|-------|
| Ancrod | 0/4   | 0/4     | 0/4   | 0/4    | 0/4   |
| PBS    | 0/4   | 1/4     | 1/4   | 1/4    | 1/4   |
